# Supplementary material for: Efficacy of Recombinant Human BMP2 and PDGF-BB in Orofacial Bone Regeneration: A Systematic Review and Meta-analysis
Source: PubMed Central journal article supplement (PMC6542831; doi:10.1038/s41598-019-44368-z), 2019-05-30
Supplement: 41598_2019_44368_MOESM1_ESM.pdf [file 41598_2019_44368_MOESM1_ESM.pdf]

# **Efficacy of Recombinant Human BMP2 and PDGF-BB in Orofacial Bone Regeneration: A Systematic Review and Meta-analysis**

Feifei Li<sup>1, 3, #</sup>, Fanyuan Yu<sup>1, 2, #</sup>, Xueyang Liao<sup>1, 3</sup>, Chenzhou Wu<sup>1, 4</sup>,  
Yitian Wang<sup>1</sup>, Chunjie Li<sup>1, 4</sup>, Feng Lou<sup>1, 2</sup>, Boer Li<sup>1, 2</sup>, Bei Yin<sup>1, 2</sup>,  
Chenglin Wang<sup>1, 2</sup>, Ling Ye<sup>1, 2\*</sup>

1 State Key Laboratory of Oral Diseases & National Clinical Research Center for Oral Diseases, West China Hospital of Stomatology, Sichuan University

2 Department of Endodontics, West China Stomatology Hospital, Sichuan University

3 Department of Pediatric Dentistry, West China Hospital of Stomatology, Sichuan University

4 Department of Oral Maxillofacial Surgery, West China Hospital of Stomatology, Sichuan University

\* Correspondence may be addressed to [yeling@scu.edu.cn](mailto:yeling@scu.edu.cn)

# These authors contributed equally to this work.

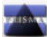

## PRISMA 2009 Flow Diagram

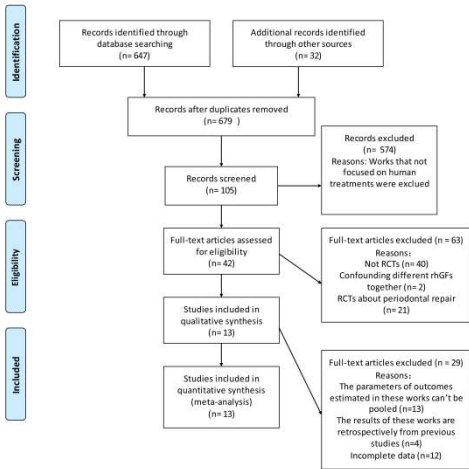

From: Moher D, Liberati A, Tetzlaff J, Altman DG, The PRISMA Group (2009). Preferred Reporting Items for Systematic Reviews and Meta-Analyses: The PRISMA Statement. *PLoS Med* 6(7): e1000097. doi:10.1371/journal.pmed1000097

# S2

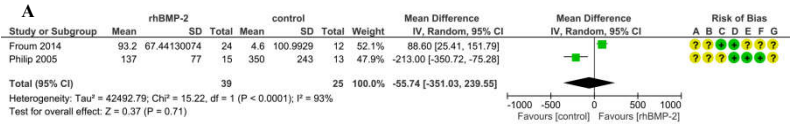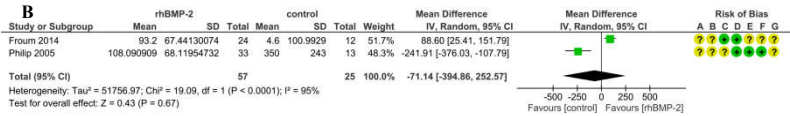

S2:Forest plot of comparison: the effect of rhBMP-2 for sinus augmentation; outcome: new bone density.

(A) The assessment of 1.5mg/ml rhBMP-2 for the regulation of new bone density. (B) The assessment about the concentrations of 0.75mg/ml and 1.5mg/ml of rhBMP-2 for the regulation of new bone density.
